# Supplementary material for: Investigation of the dinuclear effect of aluminum complexes in the ring-opening polymerization of ε-caprolactone
Source: Royal Society of Chemistry journal article supplement (doi:10.1039/c7ra02136d), 2017-01-01
Supplement: c7ra02136d1.pdf [file c7ra02136d1.pdf]

## Investigation of the Dinuclear Effect of Aluminum Complexes in the Ring-Opening Polymerization of $\epsilon$ -Caprolactone

Chiao-Yin Hsu,<sup>a</sup> Hsi-Ching Tseng,<sup>a</sup> Jaya Kishore Vandavasi,<sup>c</sup> Wei-Yi Lu,<sup>a</sup> Li-Fang Wang,<sup>a</sup> Michael Y. Chiang,<sup>a,b</sup> Yi-Chun Lai,<sup>a</sup> Hsing-Yin Chen,<sup>a\*</sup> Hsuan-Ying Chen,<sup>a\*</sup>

*a* Department of Medicinal and Applied Chemistry, Kaohsiung Medical University, Kaohsiung 80708, Taiwan, R.O.C.

*b* Department of Chemistry, National Chung Hsing University, Taichung 402, Taiwan, R.O.C.

*c* Department of Chemistry, National Sun Yat-Sen University, Kaohsiung 804, Taiwan, R.O.C.

**Electronic supplementary information available:** Polymer characterization data, and details of the kinetic study.

Table of Contents

|                                                                                                                                                                                                                                                                            |      |
|----------------------------------------------------------------------------------------------------------------------------------------------------------------------------------------------------------------------------------------------------------------------------|------|
| <b>Table S1.</b> The kinetic study of polymerizations of $\epsilon$ -caprolactone using various Al complexes as catalysts.....                                                                                                                                             | 2    |
| <b>Figure S1.</b> First-order kinetic plots of $\epsilon$ -caprolactone polymerizations with various Al complexes plotted against time.....                                                                                                                                | 3    |
| <b>Table S2.</b> The kinetic study of polymerizations of $\epsilon$ -caprolactone using various concentration of $L^{N2Bu}-Al_2Me_4$ as a catalyst.....                                                                                                                    | 4    |
| <b>Figure S3</b> First-order kinetic plots of CL polymerizations with various $[L^{N2Bu}-Al_2Me_4]$ plotted against time.....                                                                                                                                              | 5    |
| <b>Figure S4-S16.</b> $^1H$ NMR and $^{13}C$ spectra of $L^{ClBu}-H$ and all Al complexes.....                                                                                                                                                                             | 6-13 |
| <b>Figure S17.</b> $^1H$ NMR spectra of (A) benzyl alcohol; (B) $L^{N2Bu}-Al_2Me_4$ ; (C) the mixture of benzyl alcohol and $L^{N2Bu}-Al_2Me_4$ (4:1) in $CDCl_3$ after 10 min; (D) the mixture of benzyl alcohol and $L^{N2Bu}-Al_2Me_4$ (4:1) in $CDCl_3$ after 1 h..... | 12   |

**Table S1.** The kinetic study of polymerizations of  $\epsilon$ -caprolactone using various Al complexes as catalysts

| Time/min | $L^{N2Bu}-Al_2Me_4$     | $L^{N-NH}-Al_2Me_4$ | $L^{N-NBu}-Al_2Me_4$ | $L^{ClH}-AlMe_2$ | $L^{ClBu}-AlMe_2$ | $L^{Bu}-AlMe_2$ | $L^{Bn}-AlMe_2$ |
|----------|-------------------------|---------------------|----------------------|------------------|-------------------|-----------------|-----------------|
|          | <b>Conversion of CL</b> |                     |                      |                  |                   |                 |                 |
| 10       | 0.08                    | 0.04                |                      | 0.04             | 0.03              | 0.02            |                 |
| 20       | 0.33                    | 0.14                |                      | 0.07             | 0.05              | 0.04            |                 |
| 30       | 0.52                    | 0.23                |                      | 0.10             | 0.12              | 0.07            |                 |
| 40       | 0.67                    | 0.33                |                      | 0.12             | 0.15              | 0.1             |                 |
| 50       | 0.76                    | 0.41                | 0.07                 | 0.18             | 0.22              | 0.13            |                 |
| 60       | 0.80                    | 0.46                | 0.09                 | 0.22             | 0.28              | 0.17            |                 |
| 90       | 0.88                    | 0.58                | -                    |                  |                   | 0.28            |                 |
| 120      |                         | 0.68                | 0.20                 |                  | 0.64              | 0.42            |                 |
| 180      |                         | 0.77                | 0.29                 |                  |                   | 0.6             |                 |
| 190      |                         |                     |                      |                  | 0.82              |                 |                 |
| 205      |                         |                     |                      |                  |                   |                 | 0.09            |
| 210      |                         |                     | 0.36                 |                  |                   |                 |                 |
| 230      |                         |                     |                      |                  | 0.95              |                 |                 |
| 240      |                         |                     | 0.41                 |                  |                   |                 |                 |
| 270      |                         |                     | 0.43                 |                  |                   |                 |                 |
| 300      |                         |                     |                      |                  |                   |                 | 0.18            |
| 360      |                         |                     |                      |                  |                   | 0.9             |                 |
| 720      |                         |                     |                      | 0.99             |                   |                 |                 |
| 1110     |                         |                     |                      |                  |                   |                 | 0.78            |
| 1220     |                         |                     |                      |                  |                   |                 | 0.81            |
| 1330     |                         |                     | 1.00                 |                  |                   |                 |                 |
| 1395     |                         | 0.95                |                      |                  |                   |                 |                 |
| 1440     |                         |                     |                      |                  |                   |                 | 0.84            |
| 2560     |                         |                     |                      |                  |                   |                 | 0.97            |
|          |                         |                     |                      |                  |                   |                 |                 |

|                              |             |           |             |             |             |             |           |
|------------------------------|-------------|-----------|-------------|-------------|-------------|-------------|-----------|
| $k_{\text{obs}} \times 10^3$ | 26.08 (220) | 8.54 (49) | 2.30 (8)    | 6.52 (7)    | 9.79 (43)   | 6.54 (26)   | 1.40 (51) |
| Induction period/min         | 1.86 (417)  | 0         | 20.42 (623) | 14.56 (314) | 17.96 (377) | 25.93 (574) | 112 (50)  |
| $R^2$                        | 0.9827      | 0.989     | 0.997       | 0.999       | 0.994       | 0.993       | 0.997     |

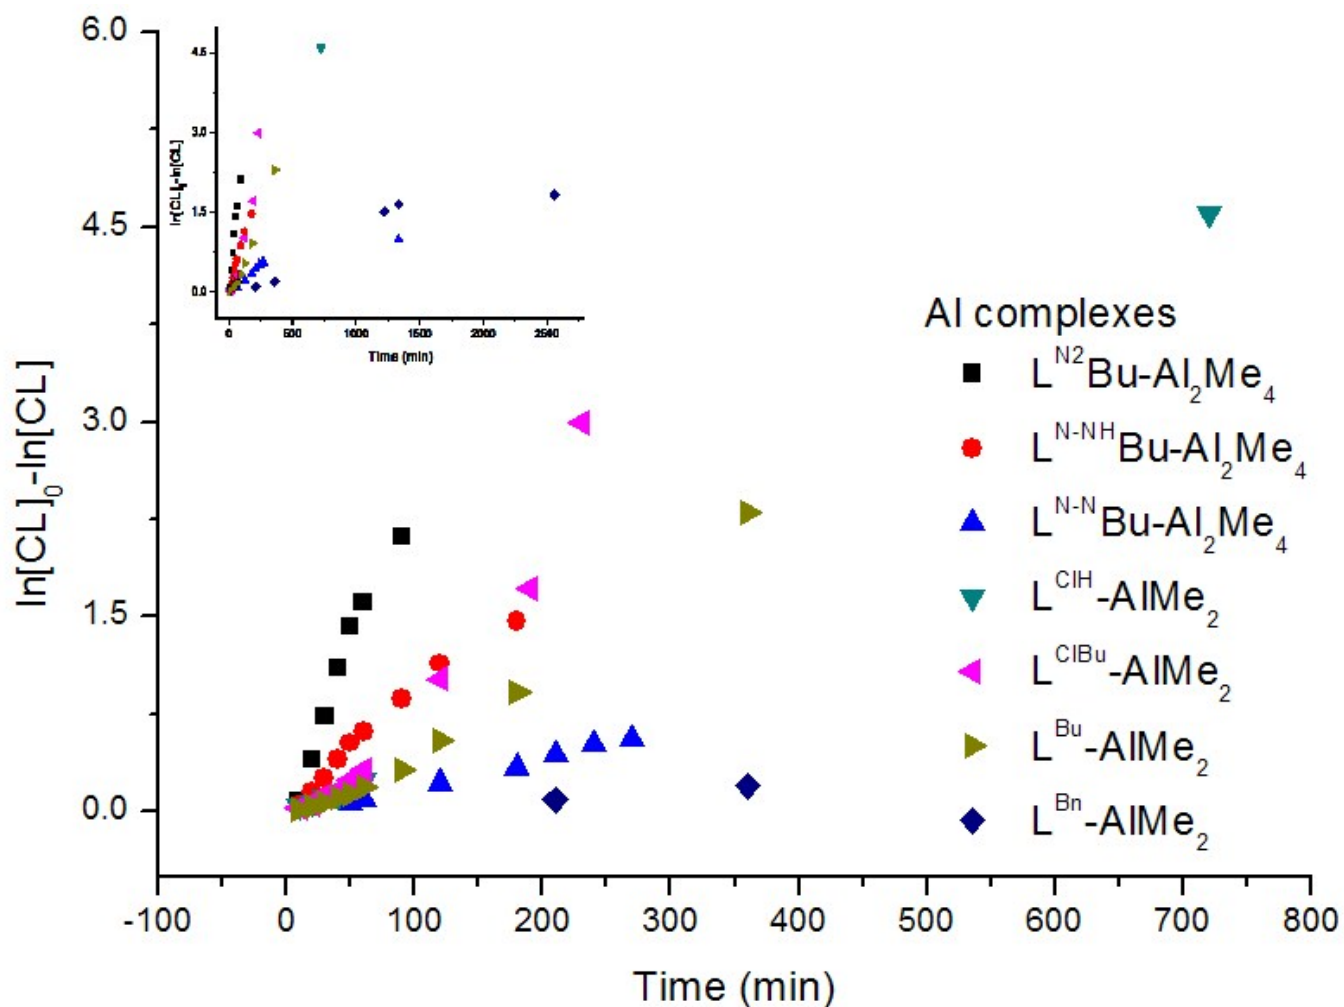

**Figure S1.** First-order kinetic plots of  $\epsilon$ -caprolactone polymerizations with various Al complexes plotted against time (■  $L^{N^2Bu-Al_2Me_4}$ , ●  $L^{N-NH-Bu-Al_2Me_4}$ , ▲  $L^{N-NBu-Al_2Me_4}$ , ▼  $L^{ClH-AlMe_2}$ , ◀  $L^{ClBu-AlMe_2}$ , ▶  $L^{Bu-AlMe_2}$ , ◆  $L^{Bn-AlMe_2}$ )

**Table S2.** The kinetic study of polymerizations of  $\epsilon$ -caprolactone using various concentration of  $L^{N2Bu-Al_2Me_4}$  as a catalyst and BnOH as an initiator

| Time (min) | $[L^{N2Bu-Al_2Me_4}]$   |        |        |        |
|------------|-------------------------|--------|--------|--------|
|            | 0.50 M                  | 1.00 M | 2.00 M | 4.00 M |
|            | <b>Conversion of CL</b> |        |        |        |
| 1          |                         |        |        | 0.02   |
| 3          |                         |        |        | 0.09   |
| 4          |                         |        |        | 0.21   |
| 5          |                         |        |        | 0.36   |
| 6          |                         |        | 0.12   | 0.50   |
| 7          |                         |        |        | 0.61   |
| 8          |                         |        | 0.24   |        |
| 10         |                         | 0.08   | 0.38   | 0.85   |
| 12         |                         |        | 0.5    |        |
| 13         |                         |        |        | 0.9    |
| 14         |                         |        | 0.61   |        |
| 16         |                         |        | 0.69   | 0.97   |
| 18         |                         |        | 0.77   |        |
| 20         | 0.05                    | 0.33   | 0.84   | 0.99   |
| 25         |                         |        | 0.88   |        |
| 30         | 0.07                    | 0.52   | 0.97   |        |
| 40         | 0.10                    | 0.67   |        |        |
| 50         | 0.12                    | 0.76   |        |        |

|                              |            |             |              |               |
|------------------------------|------------|-------------|--------------|---------------|
| 60                           | 0.14       | 0.80        |              |               |
| 90                           |            | 0.88        |              |               |
| 130                          | 0.35       |             |              |               |
| 1000                         | 0.96       |             |              |               |
|                              |            |             |              |               |
| $k_{\text{obs}} \times 10^3$ | 3.24 (2)   | 26.08 (220) | 132.92 (881) | 254.14 (1271) |
| Induction period/min         | 6.89 (247) | 1.86 (417)  | 6.41 (1.16)  | 2.70 (52)     |
| $R^2$                        | 0.999      | 0.9827      | 0.983        | 0.990         |
|                              |            |             |              |               |

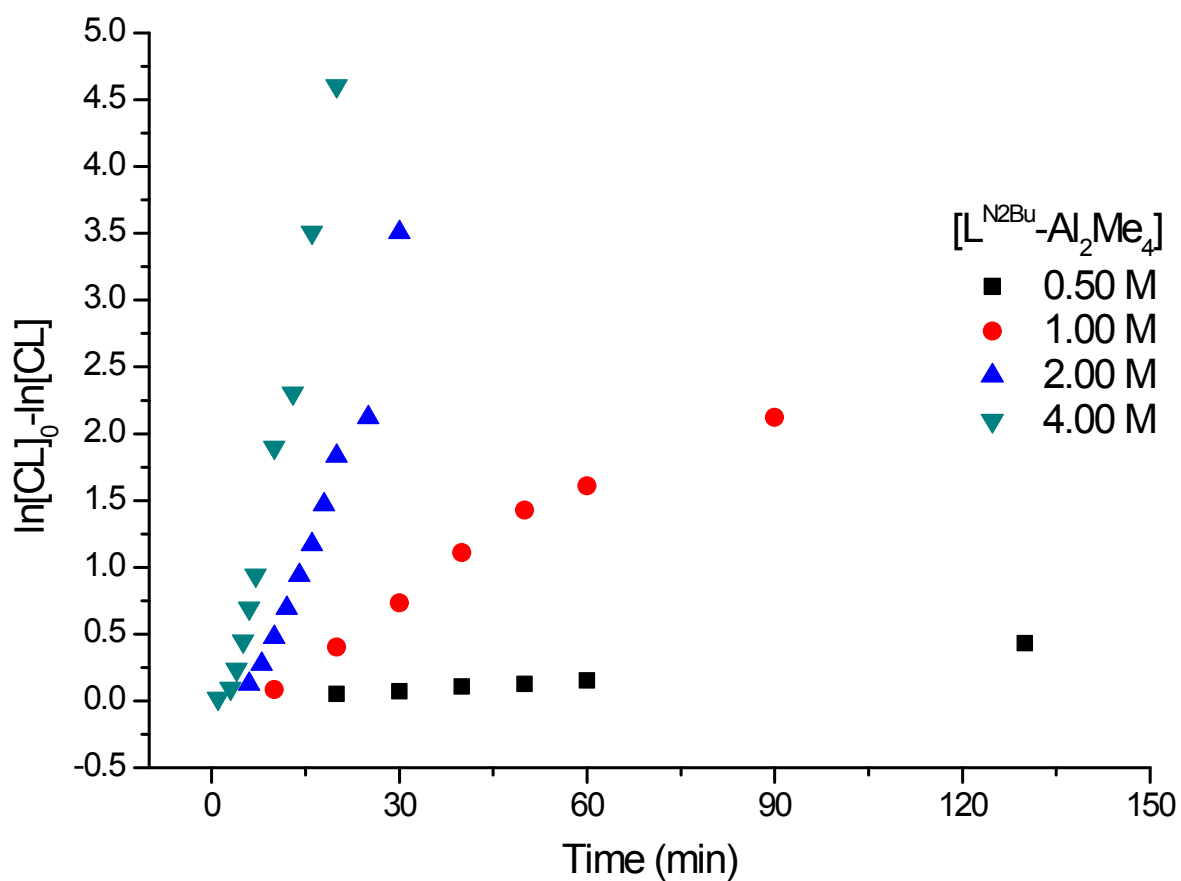

**Figure S2.** First-order kinetic plots of CL polymerizations with various  $[L^{N2Bu}-Al_2Me_4]$  plotted against time (■ 0.50 M, ● 1.00 M, ▲ 2.00 M, ▼ 4.00 M)

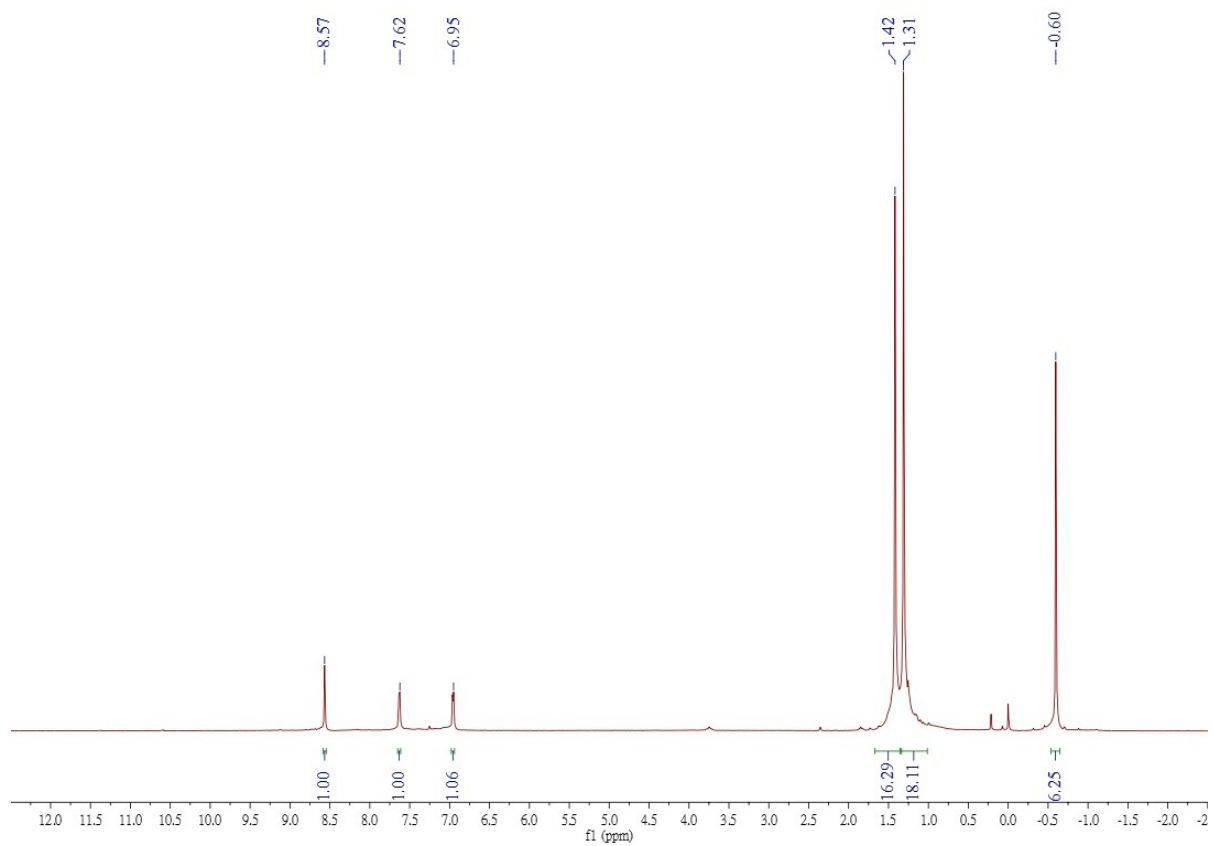

**Figure S3.**  $^1\text{H}$  NMR spectrum of  $\text{L}^{\text{N}2\text{Bu}}\text{-Al}_2\text{Me}_4$

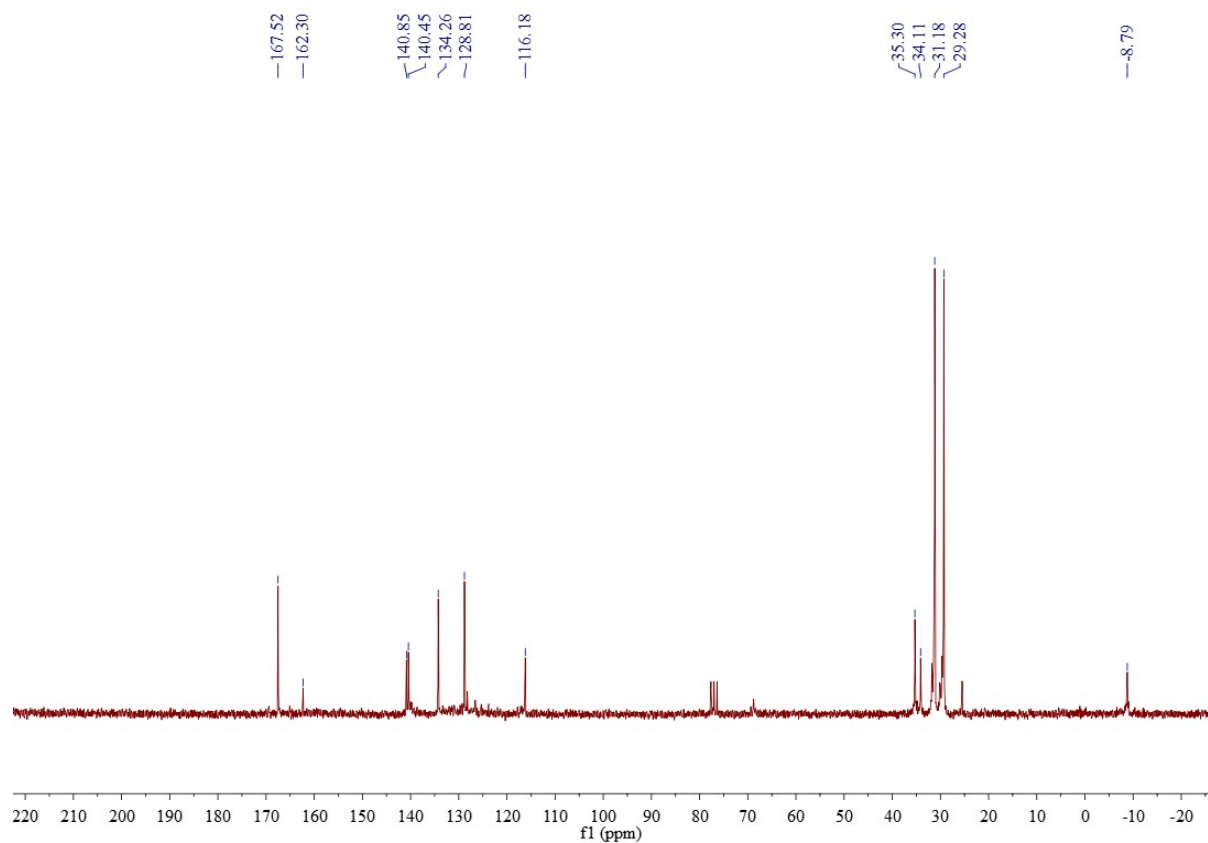

**Figure S4.**  $^{13}\text{C}$  NMR spectrum of  $\text{L}^{\text{N}2\text{Bu}}\text{-Al}_2\text{Me}_4$

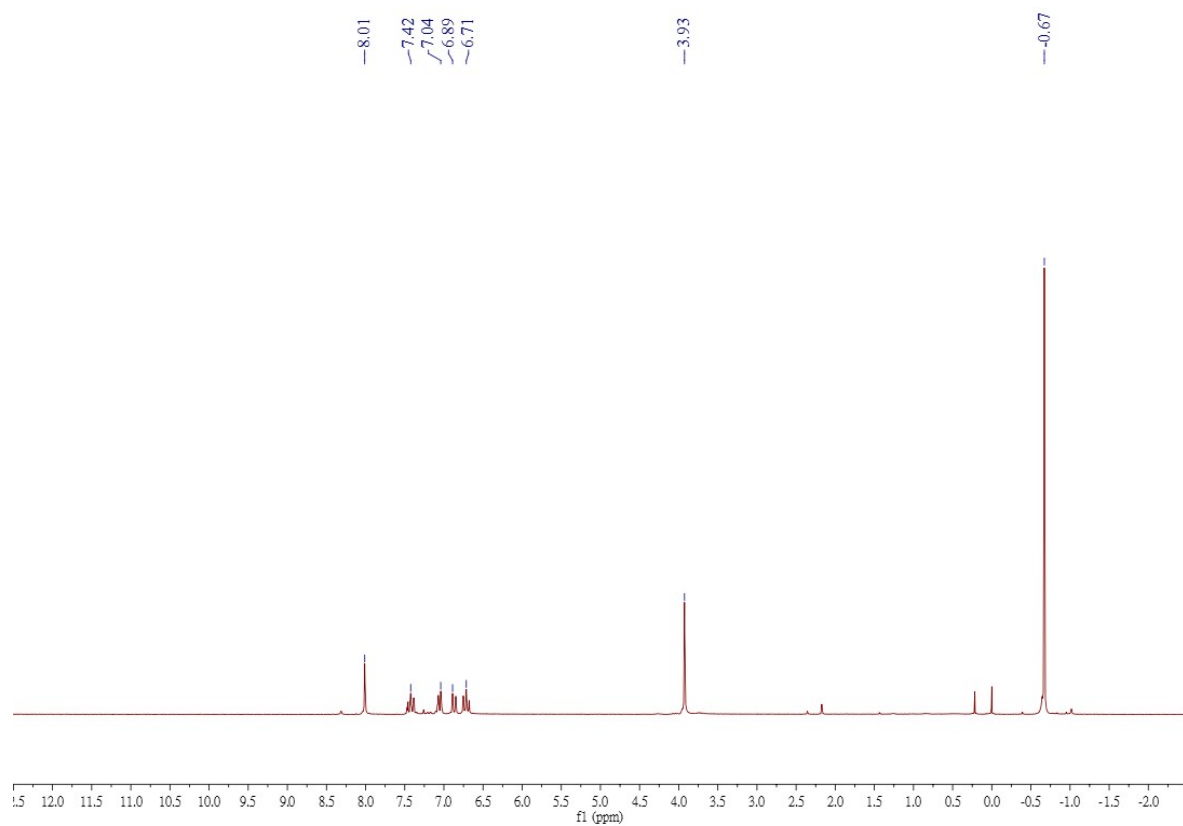

**Figure S5.**  $^1\text{H}$  NMR spectrum of  $\text{L}^{\text{N-NH}}\text{-Al}_2\text{Me}_4$

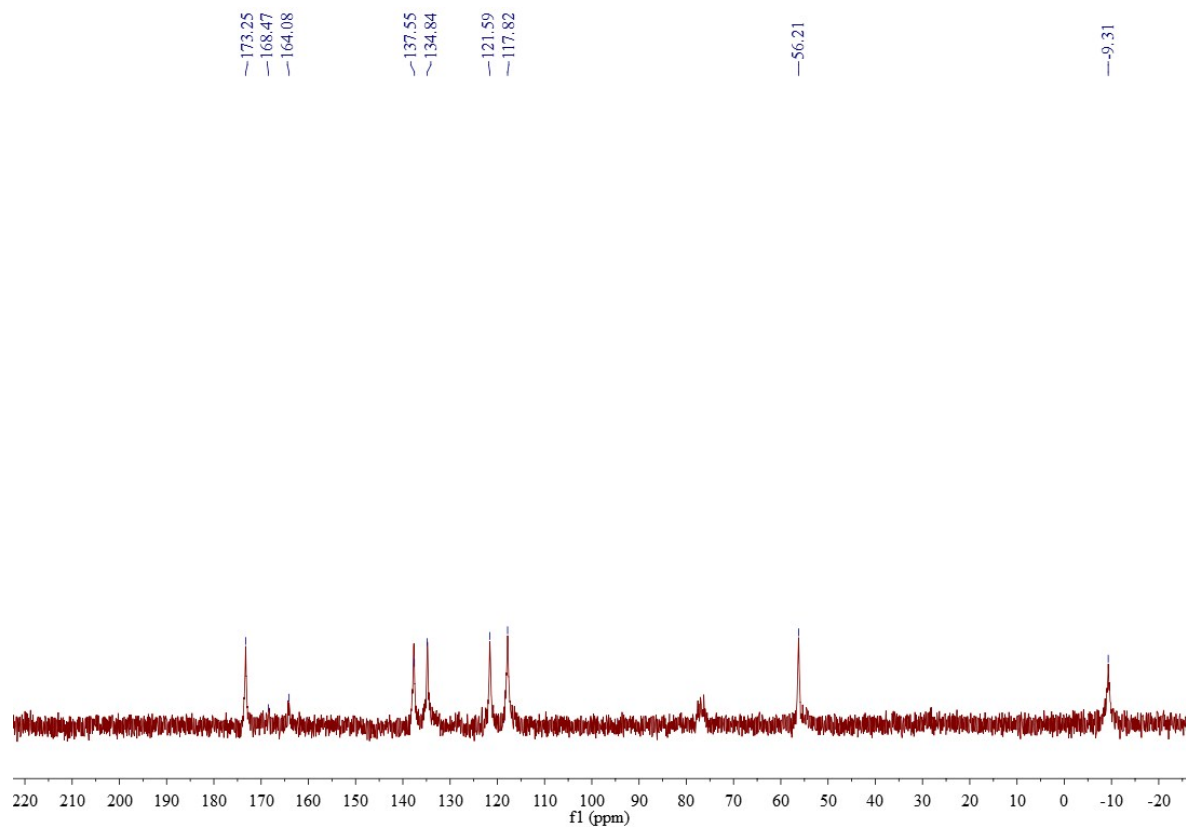

**Figure S6.**  $^{13}\text{C}$  NMR spectrum of  $\text{L}^{\text{N-NH}}\text{-Al}_2\text{Me}_4$

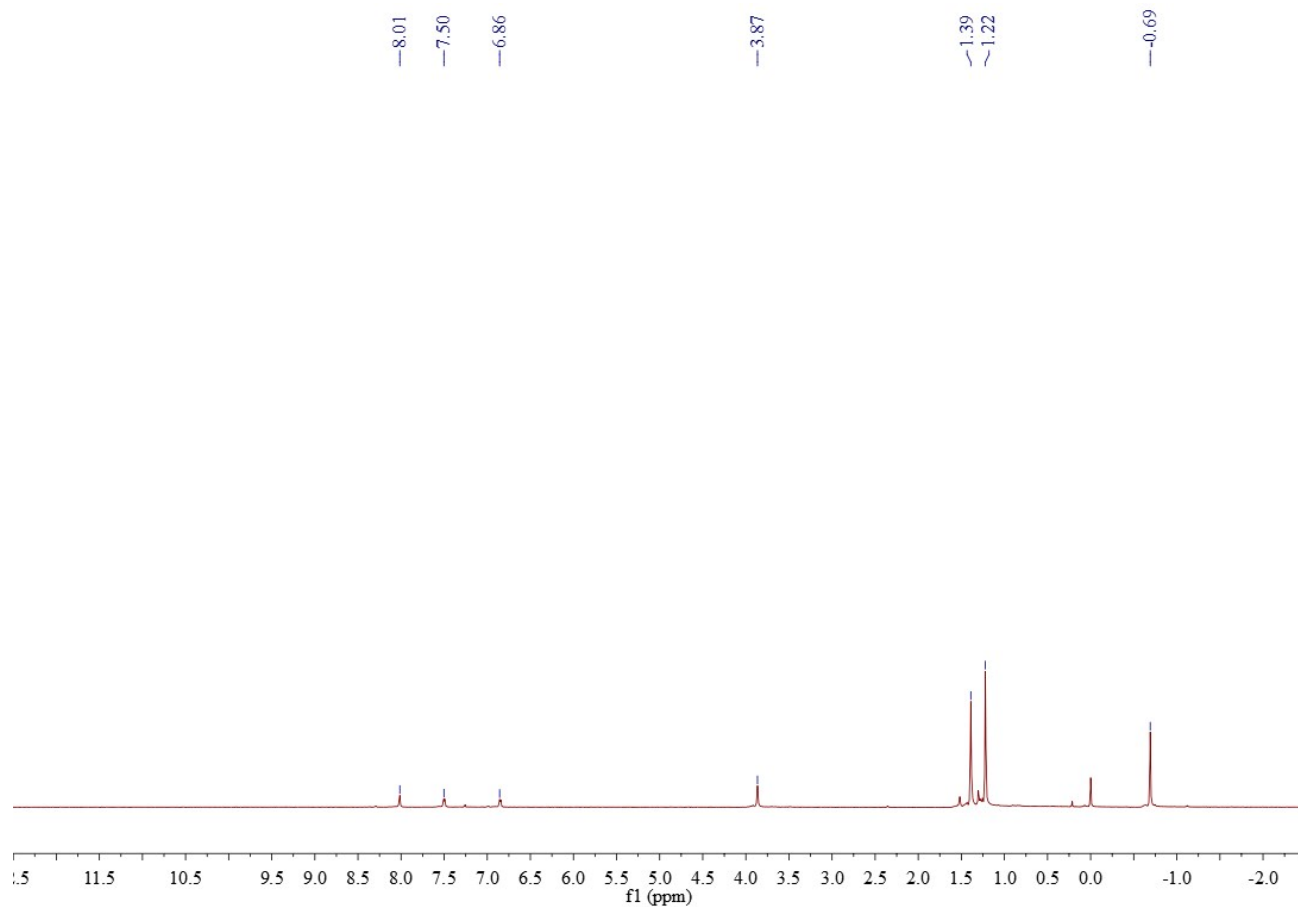

**Figure S7.**  $^1\text{H}$  NMR spectrum of  $\text{L}^{\text{N-NBu}}\text{-Al}_2\text{Me}_4$



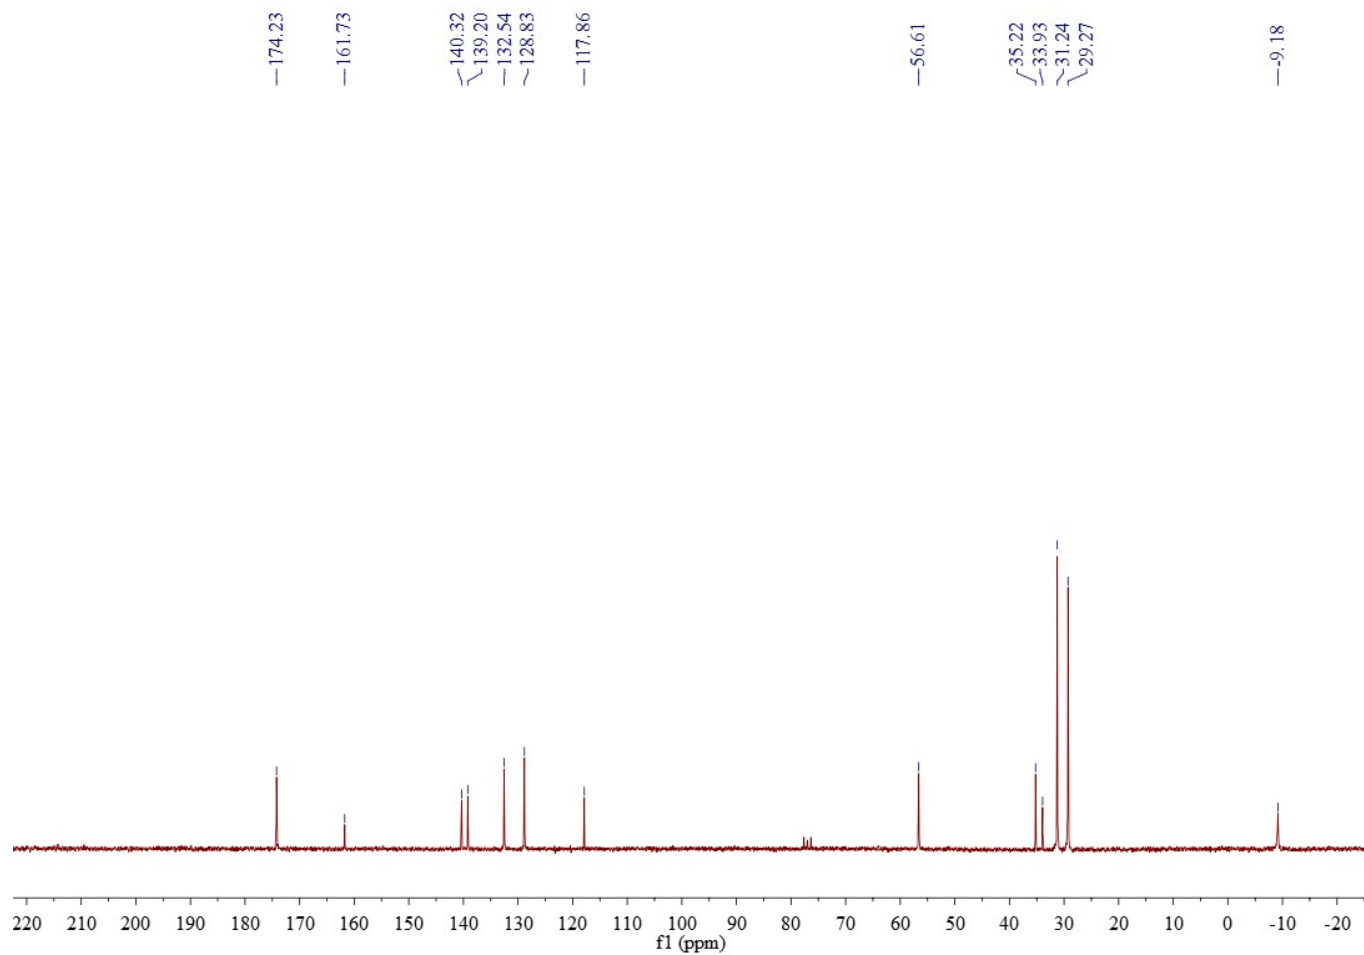

**Figure S8.**  $^{13}\text{C}$  NMR spectrum of  $\text{L}^{\text{N-NBu}}\text{-Al}_2\text{Me}_4$

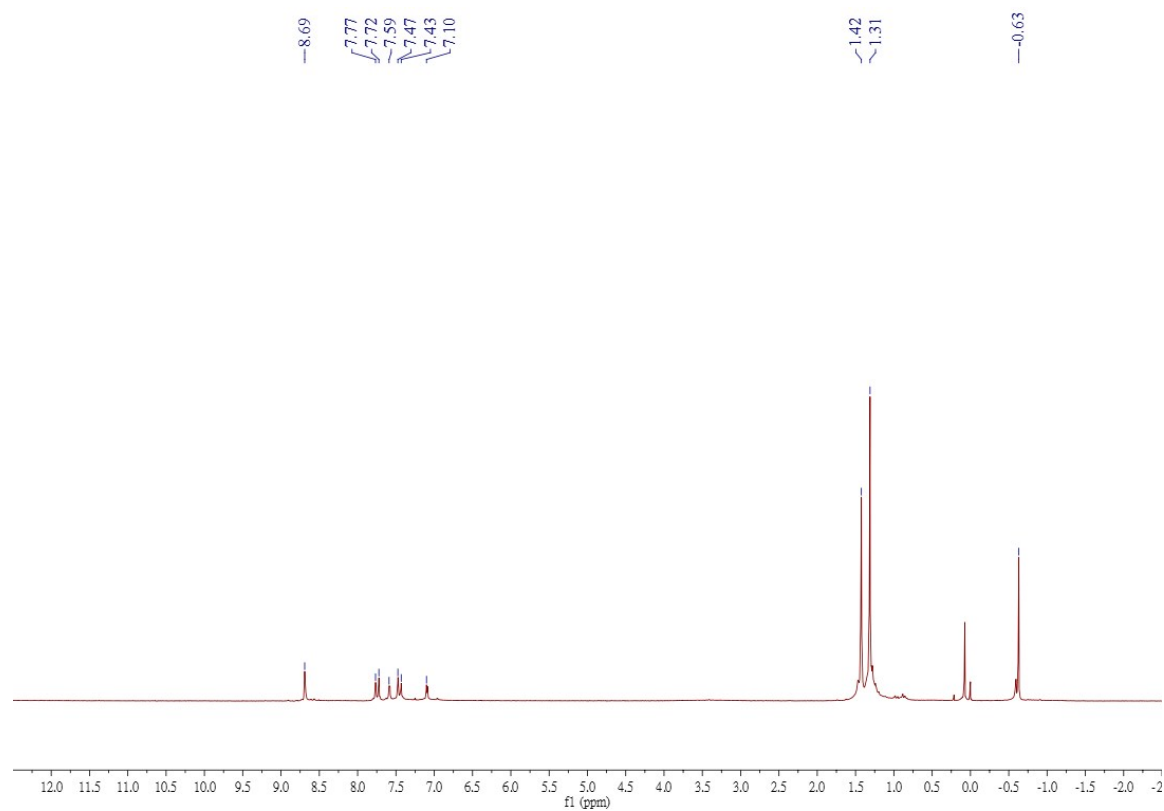

**Figure S9.**  $^1\text{H}$  NMR spectrum of  $\text{L}^{\text{CH}}\text{-AlMe}_2$

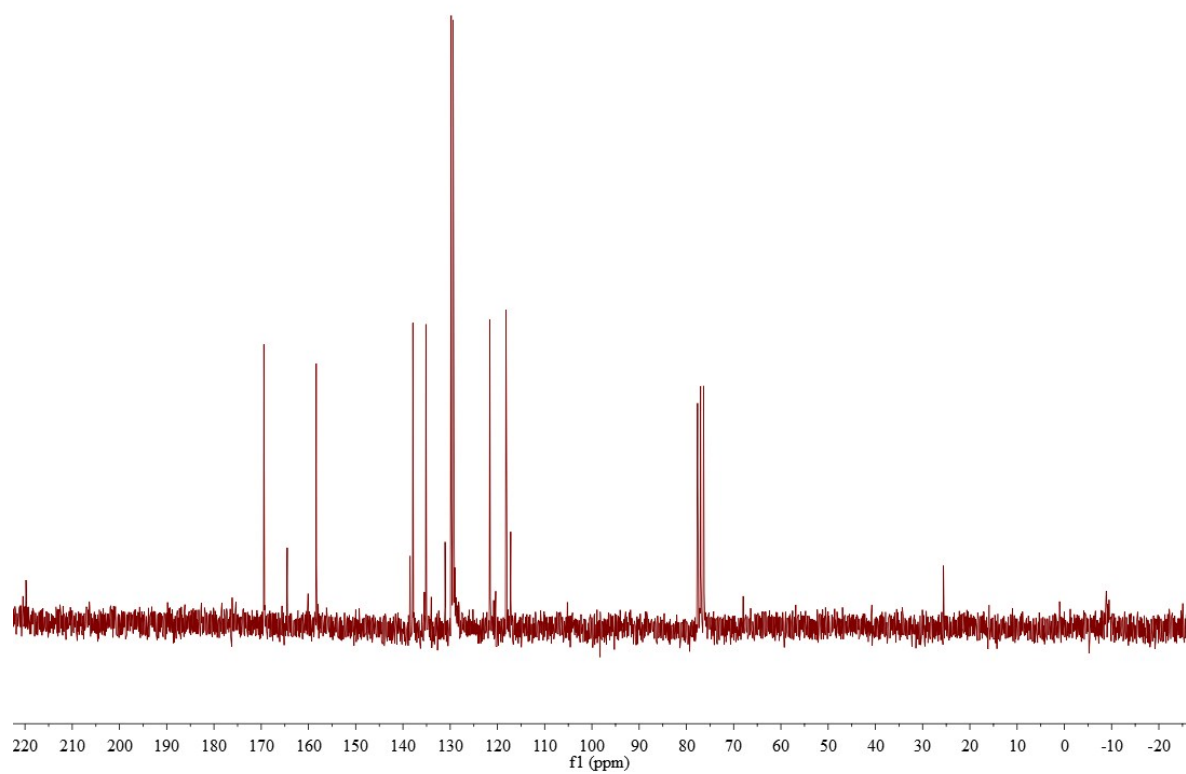

**Figure S10.**  $^{13}\text{C}$  NMR spectrum of  $\text{L}^{\text{ClH}}\text{-AlMe}_2$

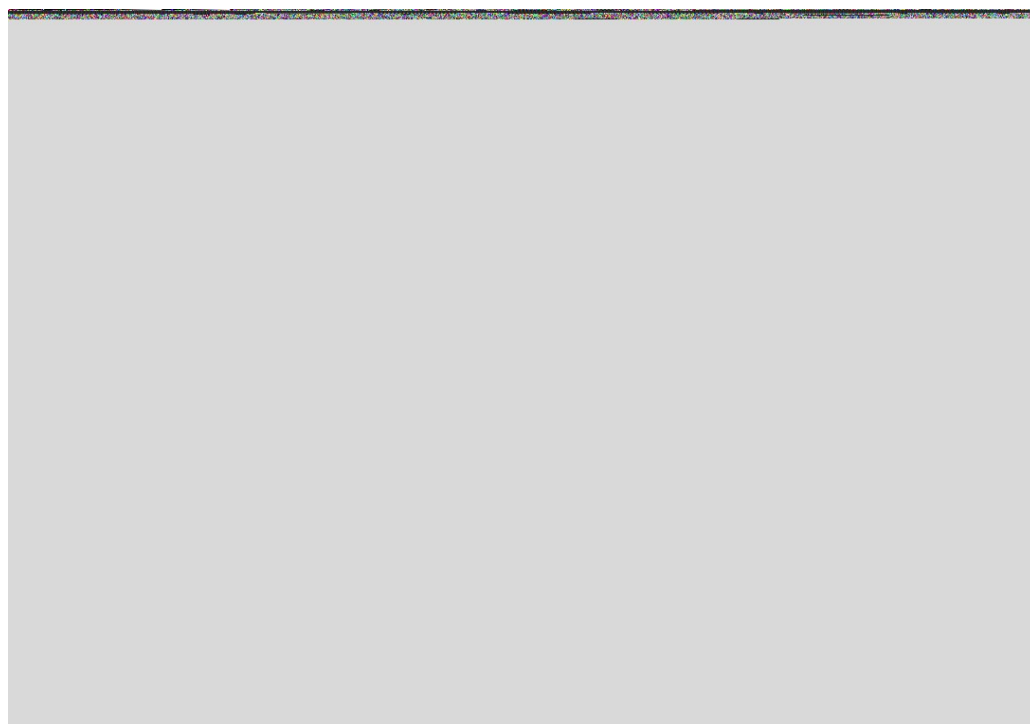

**Figure S11.**  $^1\text{H}$  NMR spectrum of  $\text{L}^{\text{ClBu}}\text{-AlMe}_2$

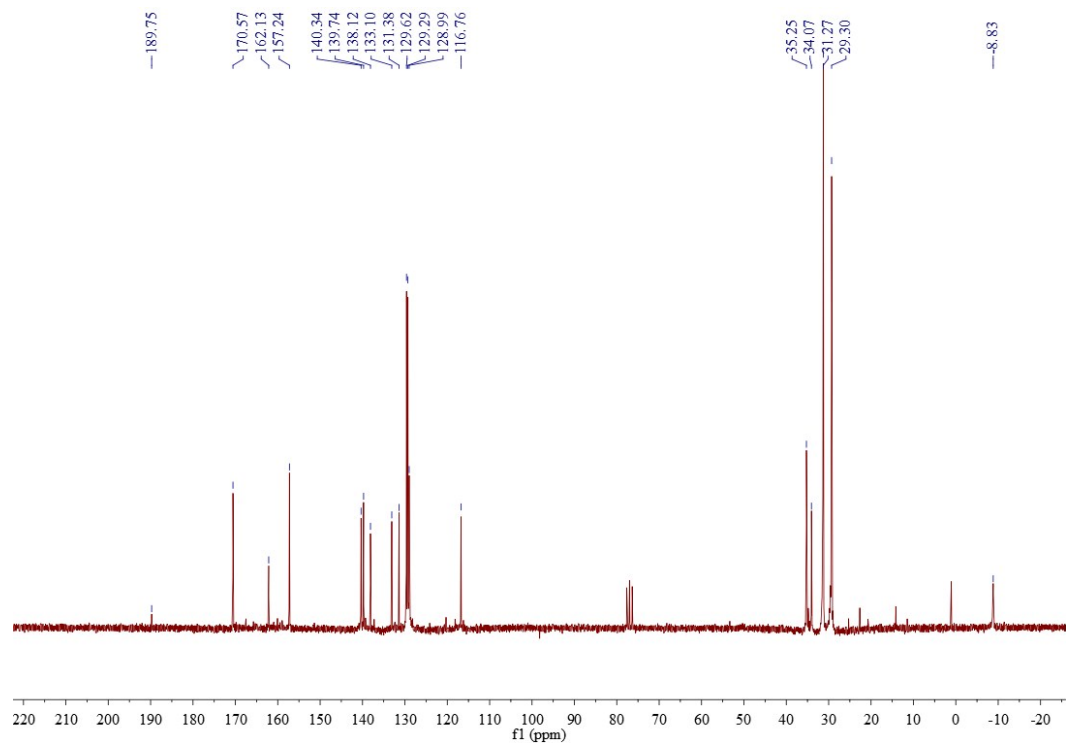

Figure S12.  $^{13}\text{C}$  NMR spectrum of  $\text{L}^{\text{CIBu}}\text{-AlMe}_2$

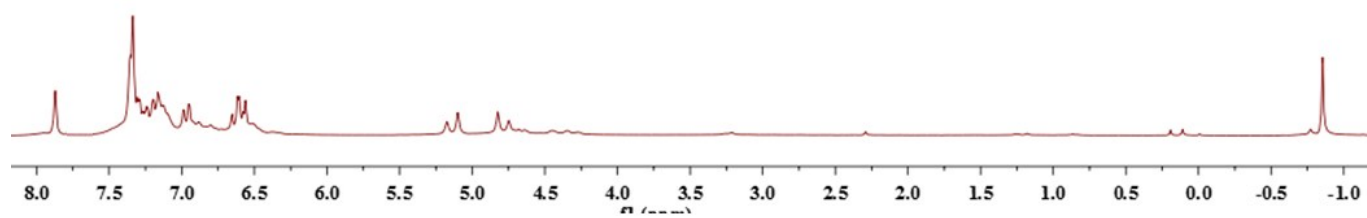

Figure S13.  $^1\text{H}$  NMR spectrum of  $\text{L}^{\text{CIBu}}\text{-AlMe}_2$

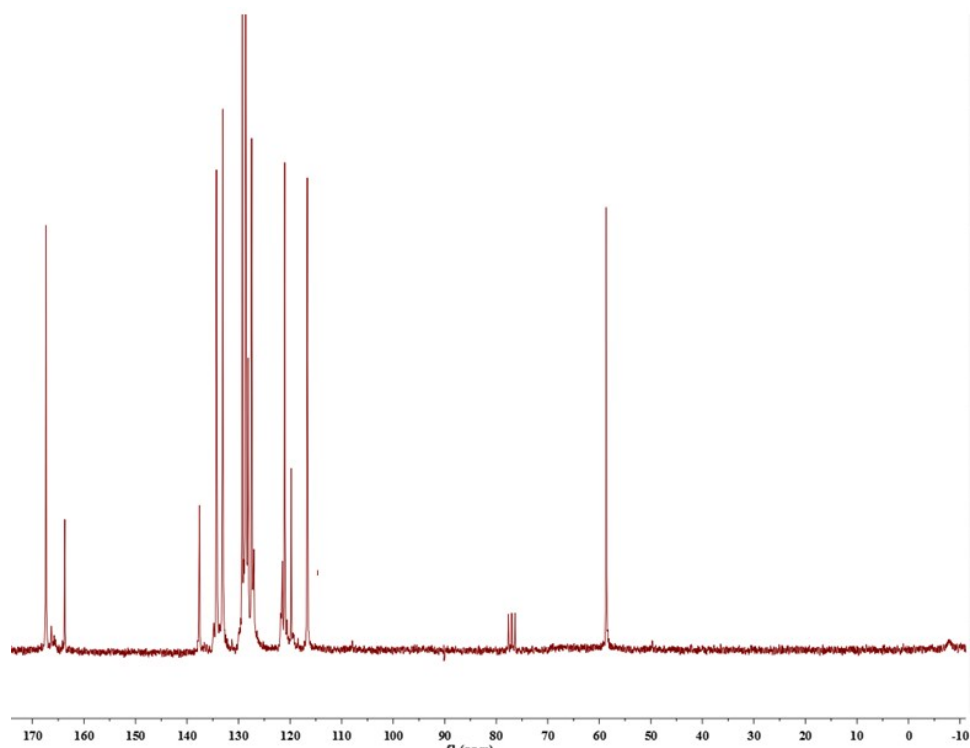

Figure S14.  $^{13}\text{C}$  NMR spectrum of  $\text{L}^{\text{CIBu-}}\text{-AlMe}_2$

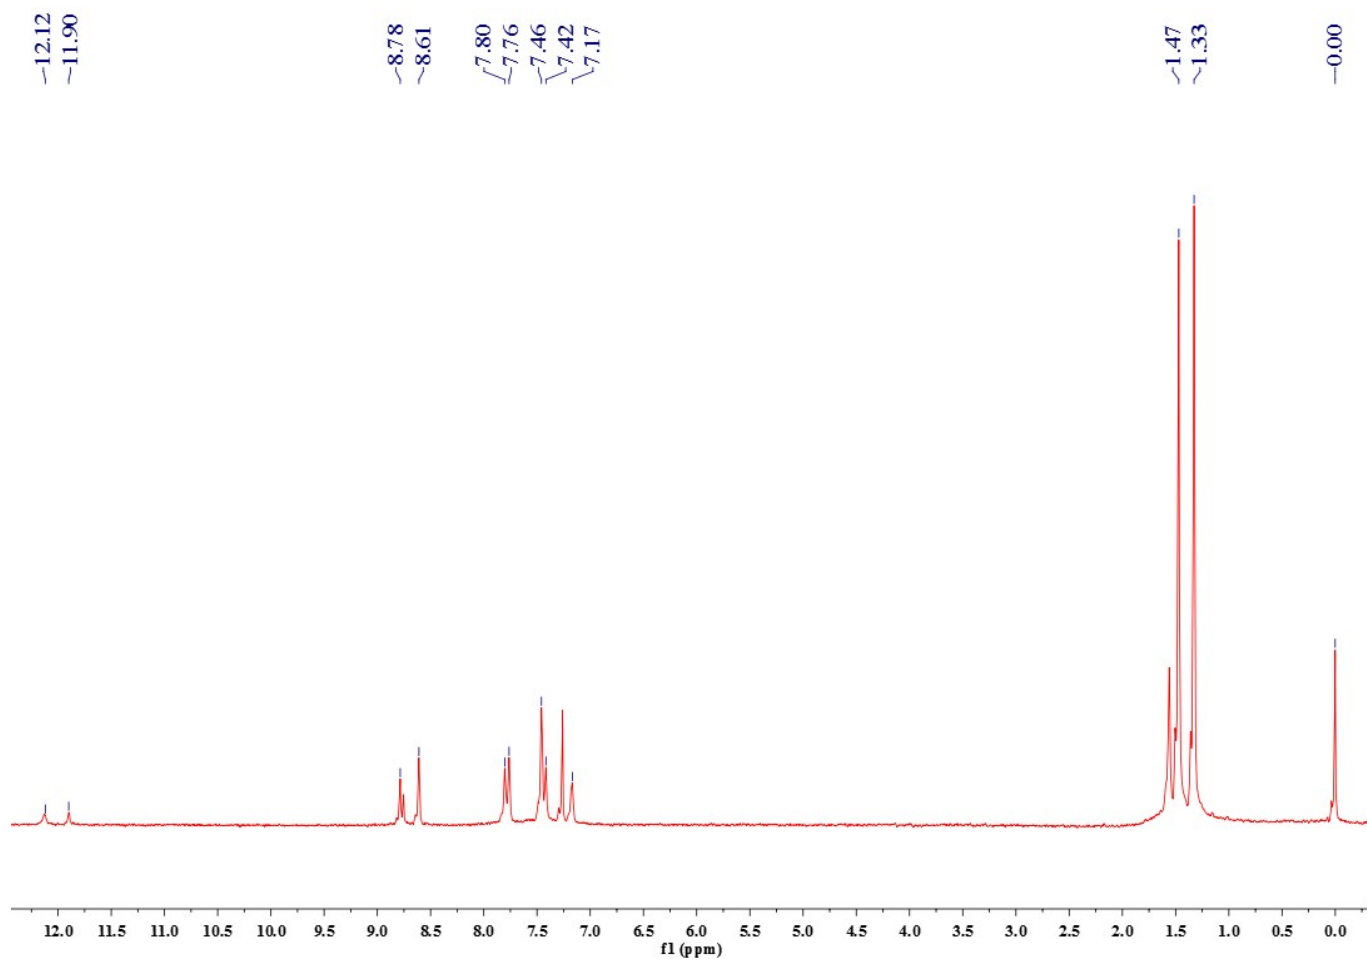

Figure S15.  $^1\text{H}$  NMR spectrum of  $\text{L}^{\text{CIBu-}}\text{-H}$

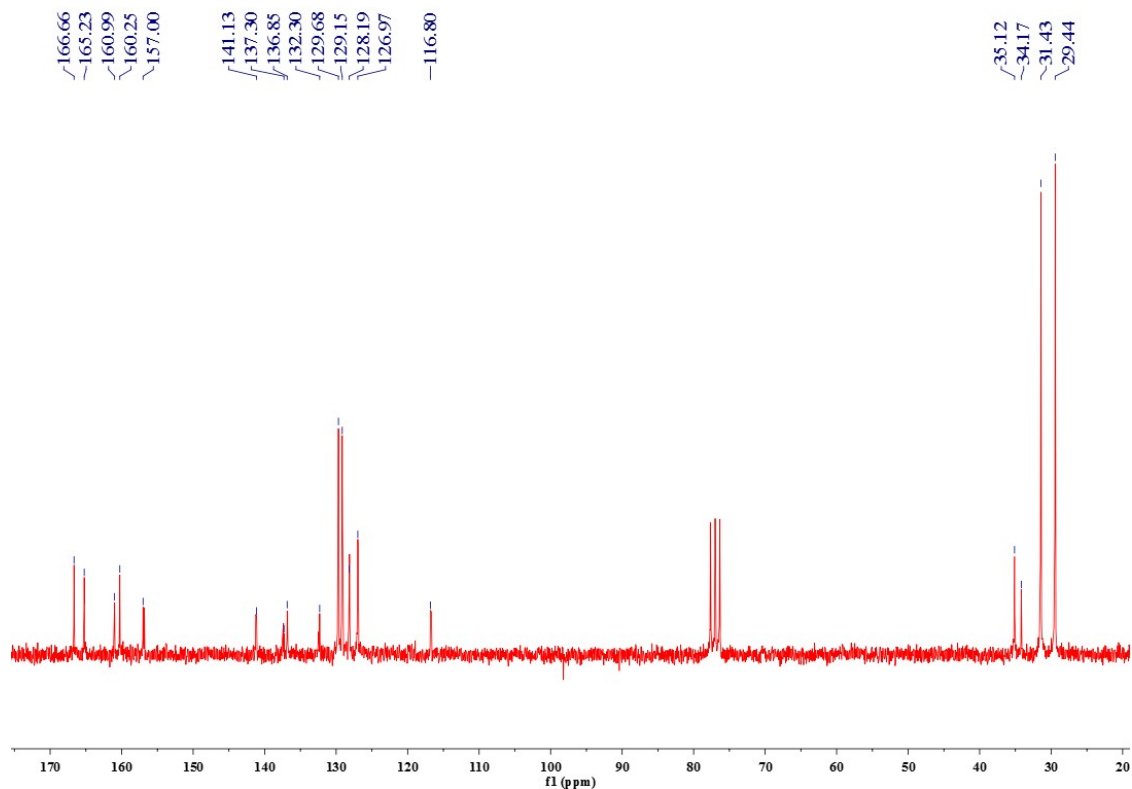

**Figure S16.**  $^{13}\text{C}$  NMR spectrum of  $\text{L}^{\text{ClBu-H}}$

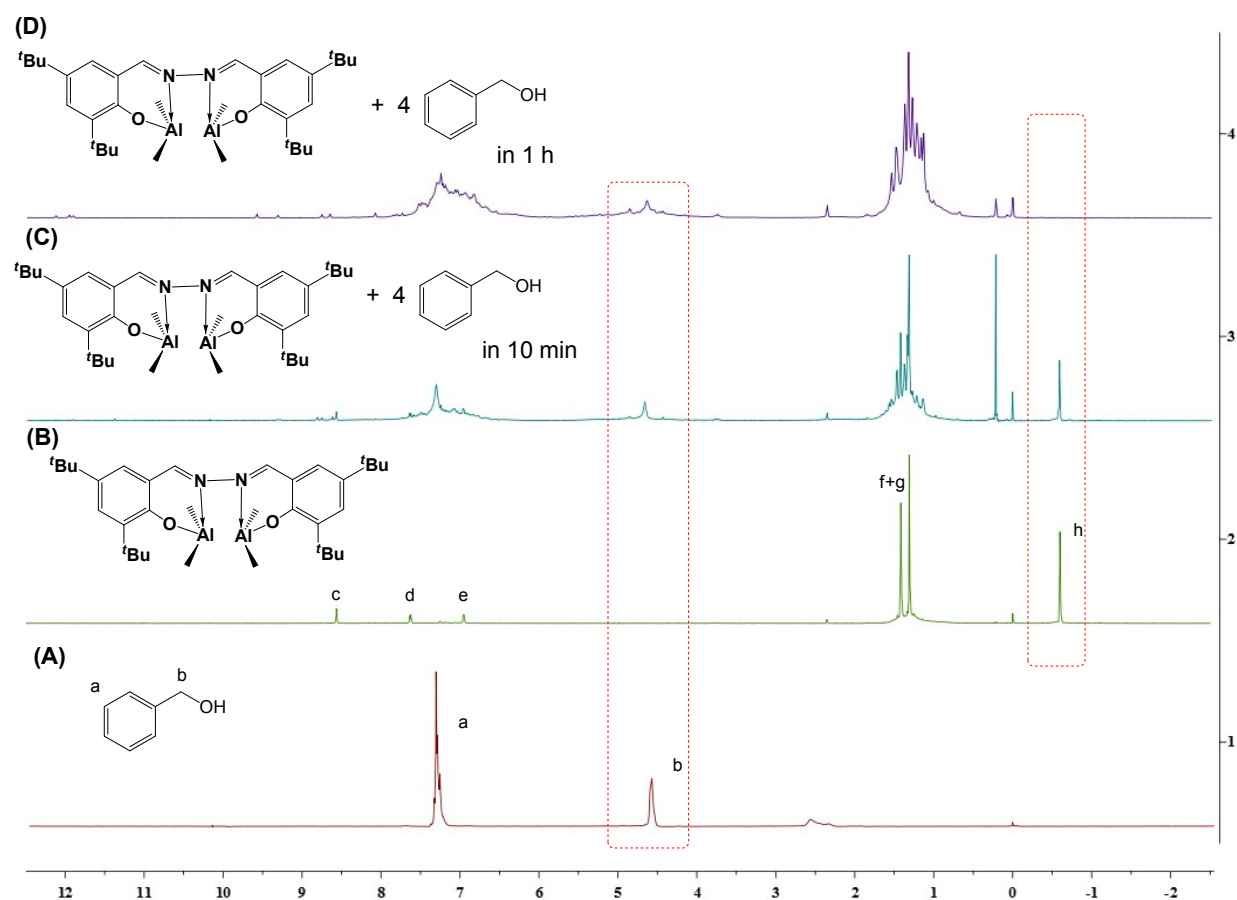

**Figure S17.**  $^1\text{H}$  NMR spectra of (A) benzyl alcohol; (B)  $\text{L}^{\text{N}2\text{Bu}}\text{-Al}_2\text{Me}_4$ ; (C) the mixture of benzyl alcohol and  $\text{L}^{\text{N}2\text{Bu}}\text{-Al}_2\text{Me}_4$  (4:1) in  $\text{CDCl}_3$  after 10 min; (D) the mixture of benzyl alcohol and  $\text{L}^{\text{N}2\text{Bu}}\text{-Al}_2\text{Me}_4$  (4:1) in  $\text{CDCl}_3$  after 1 h.
